# Supplementary material for: Prevalence of self-medication in Ghana: a systematic review and meta-analysis
Source: HighWire-hosted journal article supplement (doi:10.1136/bmjopen-2022-064627), 2023-03-01
Supplement: bmjopen-2022-064627supp001_data_supplement.pdf [file bmjopen-2022-064627supp001_data_supplement.pdf]

SUPPLEMENTARY MATERIAL

Prevalence of self-medication in Ghana: A systematic review and meta-analysis

Richmond Opoku<sup>a\*</sup>, Bismark Dwumfour-Asare<sup>b</sup>, Lawrencina Agrey-Bluwey<sup>c</sup>, Nana Esi Appiah<sup>d</sup>, Michael Ackah<sup>e</sup>, Francis Acquah<sup>c</sup>, Priscilla Fordjour Asenso<sup>e</sup>, Abdul-Aziz Issaka<sup>e</sup>

<sup>a</sup>School of Medicine, Medical Sciences and Nutrition, University of Aberdeen, Aberdeen, United Kindom

<sup>b</sup>Department of Environmental Health & Sanitation Education, Faculty of Environment and Health Education, College of Agriculture Education, Akenten Appiah-Menkah University of Skills Training and Entrepreneurial Development (Asante Mampong Campus), Ghana.

<sup>c</sup>Department of Health Administration & Education, Faculty of Science Education, University of Education, Winneba, Ghana.

<sup>d</sup>Maxillofacial Surgery Unit, Korle-Bu Teaching Hospital, Accra, Ghana.

<sup>e</sup>Department of Public Health Education, Faculty of Environment and Health Education, College of Agriculture Education, Akenten Appiah-Menkah University of Skills Training and Entrepreneurial Development (Asante Mampong Campus), Ghana.

\*Correspondence: richmondopokuezra@gmail.com

Table S1: Search strategies

| PubMed |                                                                                                                                                                                                                                                                                                                                         |
|--------|-----------------------------------------------------------------------------------------------------------------------------------------------------------------------------------------------------------------------------------------------------------------------------------------------------------------------------------------|
| Step   | Search query                                                                                                                                                                                                                                                                                                                            |
| #1     | (((((((((Self Medication[Mesh]) OR (Self Medication[Text Word])) OR (Nonprescription Drugs[Mesh])) OR (Nonprescription Drugs[Title/Abstract])) OR (Drug Misuse[Mesh])) OR (Drug Misuse[Text Word])) OR (Antibiotic[Title/Abstract]) OR (Medicine, Traditional[Mesh])) OR (Herbal Medicine[Mesh])) OR (Herbal Medicine[Title/Abstract])) |
| #2     | (Ghana[Mesh]) OR (Ghanaian[Title/Abstract])                                                                                                                                                                                                                                                                                             |
| #3     | #1 AND #2                                                                                                                                                                                                                                                                                                                               |

|                                                                                                                                         |                                                                                                                                                                                                |
|-----------------------------------------------------------------------------------------------------------------------------------------|------------------------------------------------------------------------------------------------------------------------------------------------------------------------------------------------|
| <b>Science Direct</b>                                                                                                                   |                                                                                                                                                                                                |
| Strategy                                                                                                                                | "self medication" OR "non prescription drug" OR "over the counter drug" OR "OTC drug" OR "home remedy" OR "herbal medication" OR "herbal drug" OR "Analgesic" OR "Antibiotic" AND "Ghana"      |
| <b>African Journals Online</b>                                                                                                          |                                                                                                                                                                                                |
| Strategy                                                                                                                                | "self medication" OR "non prescription drug" OR "over the counter drug" OR "OTC drug" OR "home remedy" OR "herbal medication" OR "herbal drug" OR "Analgesic" OR "Antibiotic" AND "Ghana"      |
| <b>Google Scholar</b>                                                                                                                   |                                                                                                                                                                                                |
| Strategy                                                                                                                                | "self medication" OR "non prescription drug*" OR "over the counter drug*" OR "OTC drug" OR "home remedy" OR "herbal medication" OR "herbal drug*" OR "Analgesic*" OR "Antibiotic*" AND "Ghana" |
| <b>Websites of Ministry of Health (<a href="https://www.moh.gov.gh">https://www.moh.gov.gh</a>)</b>                                     |                                                                                                                                                                                                |
| Strategy                                                                                                                                | <i>self-medication OR nonprescription drug OR over-the-counter drug OR herbal medicine</i>                                                                                                     |
| <b>Websites of Ministry of Ghana Health Service (<a href="https://www.ghanahealthservic.org">https://www.ghanahealthservic.org</a>)</b> |                                                                                                                                                                                                |
| Strategy                                                                                                                                | <i>self-medication OR nonprescription drug OR over-the-counter drug OR herbal medicine</i>                                                                                                     |

Table S2: List of articles excluded after full-text review.

| SN | Author              | Year | Title                                                                                                                                       | Decision | Reasons for exclusion                                        |
|----|---------------------|------|---------------------------------------------------------------------------------------------------------------------------------------------|----------|--------------------------------------------------------------|
| 1. | Kretchy et. al.     | 2021 | Prevalence, patterns, and beliefs about the use of herbal medicinal products in Ghana: a multi-center community-based cross-sectional study | Excluded | Unclear results on the prevalence of self-medication.        |
| 2. | Bonti, D.           | 2017 | Bridging the gap between self-medication and access to healthcare in Ghana                                                                  | Excluded | No primary data on prevalence or reasons for self-medication |
| 3. | Gbagbo & Nkrumah    | 2020 | Implications of self-medication in pregnancy for Safe Motherhood and Sustainable Development Goal-3 in selected Ghanaian communities        | Excluded | Multiple publications of the same study                      |
| 4. | Darko & Owusu-Ofori | 2020 | Antimicrobial resistance and self-medication: A survey among first-year health students at a tertiary institution in Ghana                  | Excluded | Multiple publications of the same study                      |
| 5. | Nonvignon et. al.   | 2010 | Treatment choices for fevers in children under-five years in a rural Ghanaian district                                                      | Excluded | No primary data on prevalence or reasons for self-medication |
| 6. | Agblevor E.A.       | 2016 | "I am now a doctor": self-medication practices among households in Accra                                                                    | Excluded | No primary data on prevalence or reasons for self-medication |

**Methodological Quality Assessments using the Mixed Methods Appraisal Tool (MMAT) Version 2018****Table S3: Qualitative studies**

| Study                       | S1. | S2. | 1.1 | 1.2 | 1.3 | 1.4 | 1.5 | Quality Grade |
|-----------------------------|-----|-----|-----|-----|-----|-----|-----|---------------|
| Sackey et. al. (2018)       | Yes | High          |
| Afari-Asiedu et. al. (2020) | Yes | High          |
| Agblevor et. al. (2016)     | Yes | High          |

**Table S4: Quantitative studies**

| Study                          | S1  | S2  | 4.1        | 4.2        | 4.3 | 4.4 | 4.5 | Quality Grade |
|--------------------------------|-----|-----|------------|------------|-----|-----|-----|---------------|
| Botchwey et. al. (2022)        | Yes | Yes | No         | Can't tell | Yes | No  | Yes | Moderate      |
| Issaka (2021)                  | Yes | Yes | Yes        | No         | Yes | No  | Yes | Moderate      |
| Ofori (2020)                   | Yes | Yes | Yes        | No         | Yes | No  | Yes | Moderate      |
| Owusu-Ofori et. al. (2021)     | Yes | Yes | No         | No         | Yes | No  | No  | Low           |
| Asamoah (2019)                 | Yes | Yes | Can't tell | No         | Yes | No  | Yes | Moderate      |
| Asante (2019)                  | Yes | Yes | Yes        | Yes        | Yes | No  | Yes | High          |
| Makam et. al. (2021)           | Yes | Yes | Yes        | Can't tell | Yes | Yes | No  | Moderate      |
| Acheampomaa (2018)             | Yes | Yes | Yes        | Yes        | Yes | Yes | Yes | High          |
| Adama et. al. (2021)           | Yes | Yes | Yes        | Yes        | Yes | No  | Yes | High          |
| Ofori et. al. (2021)           | Yes | Yes | Can't tell | No         | Yes | No  | Yes | Moderate      |
| Ameade, Zakaria, et al. (2018) | Yes | Yes | Yes        | Yes        | Yes | No  | No  | Moderate      |
| Kretchy et. al. (2021)         | Yes | Yes | Yes        | Yes        | Yes | Yes | Yes | High          |
| Asiedu et. al (2016)           | Yes | Yes | Yes        | No         | Yes | No  | Yes | Moderate      |
| Agyei-Boateng (2015)           | Yes | Yes | Yes        | No         | Yes | Yes | Yes | High          |
| Kyei et. al. (2014)            | Yes | Yes | Yes        | Yes        | Yes | Yes | Yes | High          |
| Amponsah et. al. (2022)        | Yes | Yes | Yes        | Yes        | Yes | No  | Yes | High          |
| Donkor et. al. (2012)          | Yes | No  | Yes        | No         | Yes | No  | No  | Low           |
| Ameko et. al (2012)            | Yes | Yes | No         | No         | Yes | No  | Yes | Moderate      |

|                               |     |     |     |            |     |            |     |          |
|-------------------------------|-----|-----|-----|------------|-----|------------|-----|----------|
| Yendaw & Tampah-Naah (2021)   | Yes | Yes | Yes | Can't tell | Yes | Yes        | Yes | High     |
| Donkor et. al. (2019)         | Yes | Yes | Yes | Yes        | Yes | Can't tell | Yes | High     |
| Enimah et. al. (2022)         | Yes | Yes | Yes | Yes        | Yes | Yes        | Yes | High     |
| Gbadago (2017)                | Yes | Yes | Yes | No         | Yes | Yes        | Yes | High     |
| Acheampong et. al. (2019)     | Yes | Yes | Yes | Yes        | Yes | No         | Yes | High     |
| Awuah et. al. (2018)          | Yes | Yes | Yes | Can't tell | Yes | Can't tell | Yes | Moderate |
| Ameade, Amalba, et al. (2018) | Yes | Yes | Yes | Yes        | Yes | Yes        | Yes | High     |
| Tagoe & Attah (2010)          | Yes | Yes | No  | No         | Yes | Can't tell | No  | Low      |

**Table S5: Mixed-Methods studies**

| Study                   | S1  | S2  | 5.1 | 5.2 | 5.3 | 5.4 | 5.5 | Quality Grade |
|-------------------------|-----|-----|-----|-----|-----|-----|-----|---------------|
| Gbagbo & Nkrumah (2020) | Yes | Yes | Yes | Yes | Yes | No  | Yes | High          |

**Table S6: Detailed characteristics of studies used in the systematic review**

| Reference                   | Study Design      | Year of study | Sample size | Reported prevalence (%) | Age of study population (mean±sd) | Study population              | Study region | Geopolitical zone | Setting | Peer review status | Quality grade |
|-----------------------------|-------------------|---------------|-------------|-------------------------|-----------------------------------|-------------------------------|--------------|-------------------|---------|--------------------|---------------|
| Owusu-Ofori et. al. (2021)  | CS (Quantitative) | 2019          | 264         | 56.2%                   | 19.5±1.88                         | Tertiary students             | AR           | Middle-Belt       | Urban   | Peer-reviewed      | Low           |
| Agyei-Boateng (2015)        | CS (Quantitative) | 2015          | 300         | 68.3%                   | <15-50                            | Pregnant Women                | AR           | Middle-Belt       | Urban   | Grey               | High          |
| Donkor et.al. (2019)        | CS (Quantitative) | 2017          | 261         | 33.3%                   | 36.26±14.94                       | Patients                      | AR/ER        | Middle-Belt       | Urban   | Peer-reviewed      | High          |
| Afari-Asiedu et. al. (2020) | CS (Qualitative)  | 2019          | 70          | High prevalence         | 20-50                             | Health workers/General public | BER          | Middle-Belt       | Rural   | Peer-reviewed      | High          |
| Enimah et. al. (2022)       | CS (Quantitative) | 2020          | 191         | 44.00%                  | 44.32±16.27                       | General public                | CR           | Coastal-Belt      | Rural   | Peer-reviewed      | High          |

|                           |                     |           |     |                 |             |                                     |        |               |       |               |          |
|---------------------------|---------------------|-----------|-----|-----------------|-------------|-------------------------------------|--------|---------------|-------|---------------|----------|
| Gbagbo & Nkrumah (2020b)  | CS (Mixed-method)   | 2018      | 100 | 69.0%           | 29 ± 5      | Pregnant Women                      | CR     | Coastal-Belt  | Rural | Peer-reviewed | High     |
| Asiedu et. al (2016)      | CS (Quantitative)   | 2016      | 469 | 25.2%           | 22 ±2.5     | Tertiary students                   | CR     | Coastal-Belt  | Urban | Peer-reviewed | Moderate |
| Kyei et. al. (2014)       | CS (Quantitative)   | 2013      | 421 | 23.3%           | 39.8±18.6   | General public                      | CR     | Coastal-Belt  | Urban | Peer-reviewed | High     |
| Tagoe & Attah (2010)      | CS (Quantitative)   | 2010      | 530 | 71.50%          | ≥15         | Patients                            | CR     | Coastal-Belt  | Urban | Peer-reviewed | Low      |
| Asamoah (2019)            | CS (Quantitative)   | 2019      | 356 | 86.0%           | 35 (median) | General public                      | ER     | Middle-Belt   | Rural | Grey          | Moderate |
| Amponsah et. al. (2022)   | CS (Quantitative)   | 2019      | 337 | 53.10%          | 18-41       | Tertiary students                   | GAR    | Coastal-Belt  | Urban | Peer-reviewed | High     |
| Ofori et. al. (2021)      | CS (Quantitative)   | 2017      | 417 | 66.7%           | 35.6 ±10.6  | Traders                             | GAR    | Coastal-Belt  | Urban | Grey          | Moderate |
| Kretchy et. al. (2021)    | CS (Quantitative)   | 2016      | 350 | 36.0%           | 18-65       | General public                      | GAR    | Coastal-Belt  | Rural | Peer-reviewed | High     |
| Asante (2019)             | CS (Quantitative)   | 2019      | 319 | 46.4%           | 35.6±13.6   | Patients                            | GAR    | Coastal-Belt  | Urban | Grey          | High     |
| Acheampong et. al. (2019) | CS (Quantitative)   | 2017      | 680 | 33.5%           | 16.7±1.98   | Adolescents                         | GAR    | Coastal-Belt  | Urban | Peer-reviewed | High     |
| Acheampomaa (2018)        | CS (Quantitative)   | 2018      | 126 | 78.6%           | <19-40+     | General public                      | GAR    | Coastal-Belt  | Urban | Grey          | High     |
| Awuah et. al. (2018)      | CS (Quantitative)   | 2013      | 707 | 61.40%          | 15-59       | General public                      | GAR    | Coastal-Belt  | Urban | Peer-reviewed | Moderate |
| Gbadago (2017)            | CS (Quantitative)   | 2017      | 396 | 48.0%           | 22.6±0.17   | Tertiary students                   | GAR    | Coastal-Belt  | Urban | Grey          | High     |
| Donkor et. al. (2012)     | CS (Quantitative)   | 2008      | 600 | 70.3%           | n.s         | Tertiary students                   | GAR    | Coastal-Belt  | Urban | Peer-reviewed | Low      |
| Ameko (2012)              | CS (Quantitative)   | 2008      | 150 | 34.7%           | n.s         | Patients                            | GAR    | Coastal-Belt  | Urban | Peer-reviewed | Moderate |
| Sackey et. al. (2018)     | Long. (Qualitative) | 2014-2016 | 33  | High prevalence | n.s         | General public                      | GAR/CR | Coastal-Belt  | Mixed | Grey          | High     |
| Agblevor et. al (2016)    | Long. (Qualitative) | 2014-2016 | 51  | High prevalence | n.s         | General public/chemical shop owners | GAR/CR | Coastal-Belt  | Mixed | Grey          | High     |
| Issaka (2021)             | CS (Quantitative)   | 2020      | 170 | 77.1%           | 18-54       | Nurses                              | NR     | Northern-Belt | Urban | Grey          | Moderate |

|                                |                   |      |     |        |            |                   |     |               |       |               |          |
|--------------------------------|-------------------|------|-----|--------|------------|-------------------|-----|---------------|-------|---------------|----------|
| Ameade, Zakaria, et al. (2018) | CS (Quantitative) | 2017 | 370 | 52.7%  | 10-50      | Pregnant Women    | NR  | Northern-Belt | Urban | Peer-reviewed | Moderate |
| Ameade, Amalba, et al. (2018)  | CS (Quantitative) | 2015 | 293 | 19.80% | 23±5.07    | Tertiary students | NR  | Northern-Belt | Urban | Peer-reviewed | High     |
| Botchwey et. al. (2022)        | CS (Quantitative) | 2021 | 50  | 68.0%  | 13-49      | Pregnant Women    | OR  | Middle-Belt   | Rural | Peer-reviewed | Moderate |
| Adama et. al. (2021)           | CS (Quantitative) | 2017 | 367 | 74.0%  | 28.6 ±4.9  | Pregnant Women    | UWR | Northern-Belt | Urban | Peer-reviewed | High     |
| Yendaw & Tampah-Naah (2021)    | CS (Quantitative) | 2020 | 122 | 29.5%  | 14-54      | Migrants          | UWR | Northern-Belt | Urban | Peer-reviewed | High     |
| Makam et. al. (2021)           | CS (Quantitative) | 2018 | 371 | 62.0%  | 27 ±6.4    | Pregnant Women    | VR  | Coastal-Belt  | Urban | Peer-reviewed | Moderate |
| Ofosu (2020)                   | CS (Quantitative) | 2020 | 400 | 62.3%  | 36.9 ±14.8 | General public    | WR  | Coastal-Belt  | Urban | Grey          | Moderate |

**Note:** CS = cross-sectional; Long. = longitudinal; n.s = not specified; AR = Ashanti Region; BER = Bono East Region; CR = Central Region; ER = Eastern Region; GAR = Greater Accra Region; NR = Northern Region; OR = Oti Region; UWR = Upper West Region; WR = Western Region.
